# Supplementary material for: XRD-Thermal Combined Analyses: An Approach to Evaluate the Potential of Phytoremediation, Phytomining, and Biochar Production
Source: MDPI journal article supplement (doi:10.3390/ijerph16111976), 2019-06-04
Supplement: s1 [file s1]

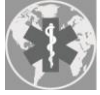

## *Supplementary Material*

# **XRD-Thermal Combined Analyses: an Approach to Evaluate the Potential of Phytoremediation, Phytomining and Biochar Production**

**Dario Fancello <sup>1</sup>, Jessica Scalco <sup>1</sup>, Daniela Medas <sup>1,\*</sup>, Elisa Rodeghero <sup>2</sup>, Annalisa Martucci <sup>2</sup>, Carlo Meneghini <sup>3</sup> and Giovanni De Giudici <sup>1</sup>**

<sup>1</sup> Department of Chemical and Geological Sciences, University of Cagliari, Cittadella Universitaria, Monserrato, 09042, CA – Italy;

<sup>2</sup> Department of Physics and Earth Sciences, University of Ferrara, Ferrara, I-44100, Italy;

<sup>3</sup> Department of Sciences, University Roma Tre, 00146, Rome, Italy;

\* Correspondence: [dmedas@unica.it](mailto:dmedas@unica.it)

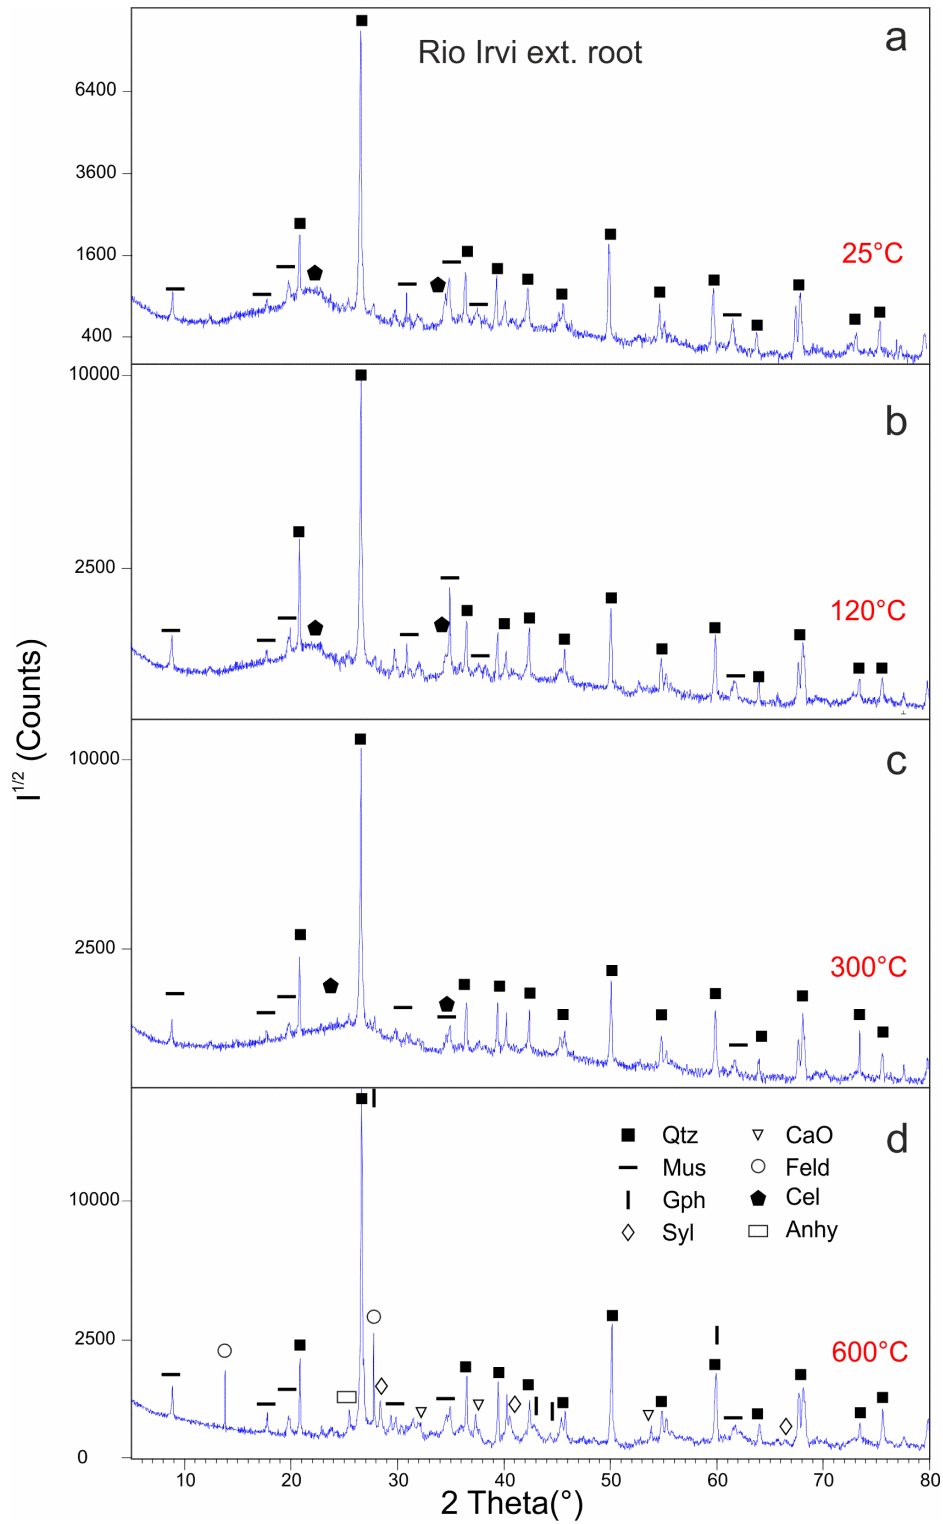

**Figure S1.** Comparison of XRD patterns collected on external roots from Rio Irvi before (a) and after *ex-situ* heating (b-d). Intensities ( $I^{1/2}$ ) are reported in square root scale. Abbreviation are: Qtz, quartz; Mus, muscovite; Gph, graphite; Syl, sylvite; CaO, calcium oxide; Feld, feldspars, Cell, cellulose; Anhy, anhydrite.

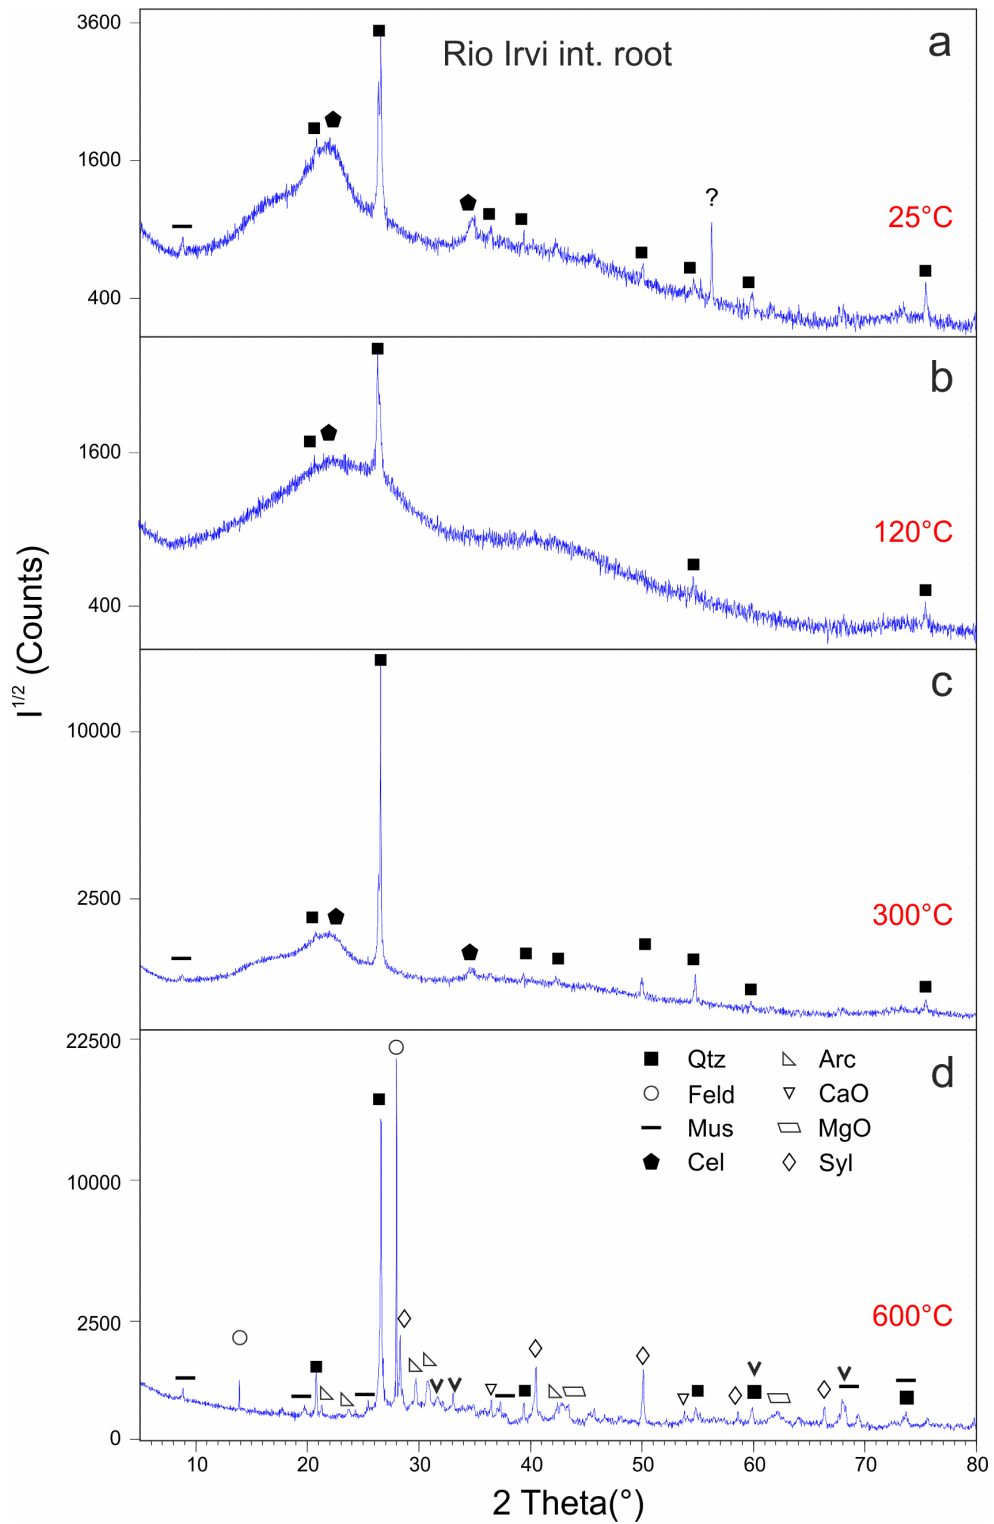

**Figure S2.** Comparison of XRD patterns collected on internal roots from Rio Irvi before (a) and after *ex-situ* heating (b-d). Intensities ( $I^{1/2}$ ) are reported in square root scale. Abbreviation are: Qtz, quartz; Feld, feldspars; Mus, muscovite; Cel, cellulose; Arc, arcanite; CaO, calcium oxide; MgO, magnesium oxide; Syl, sylvite.

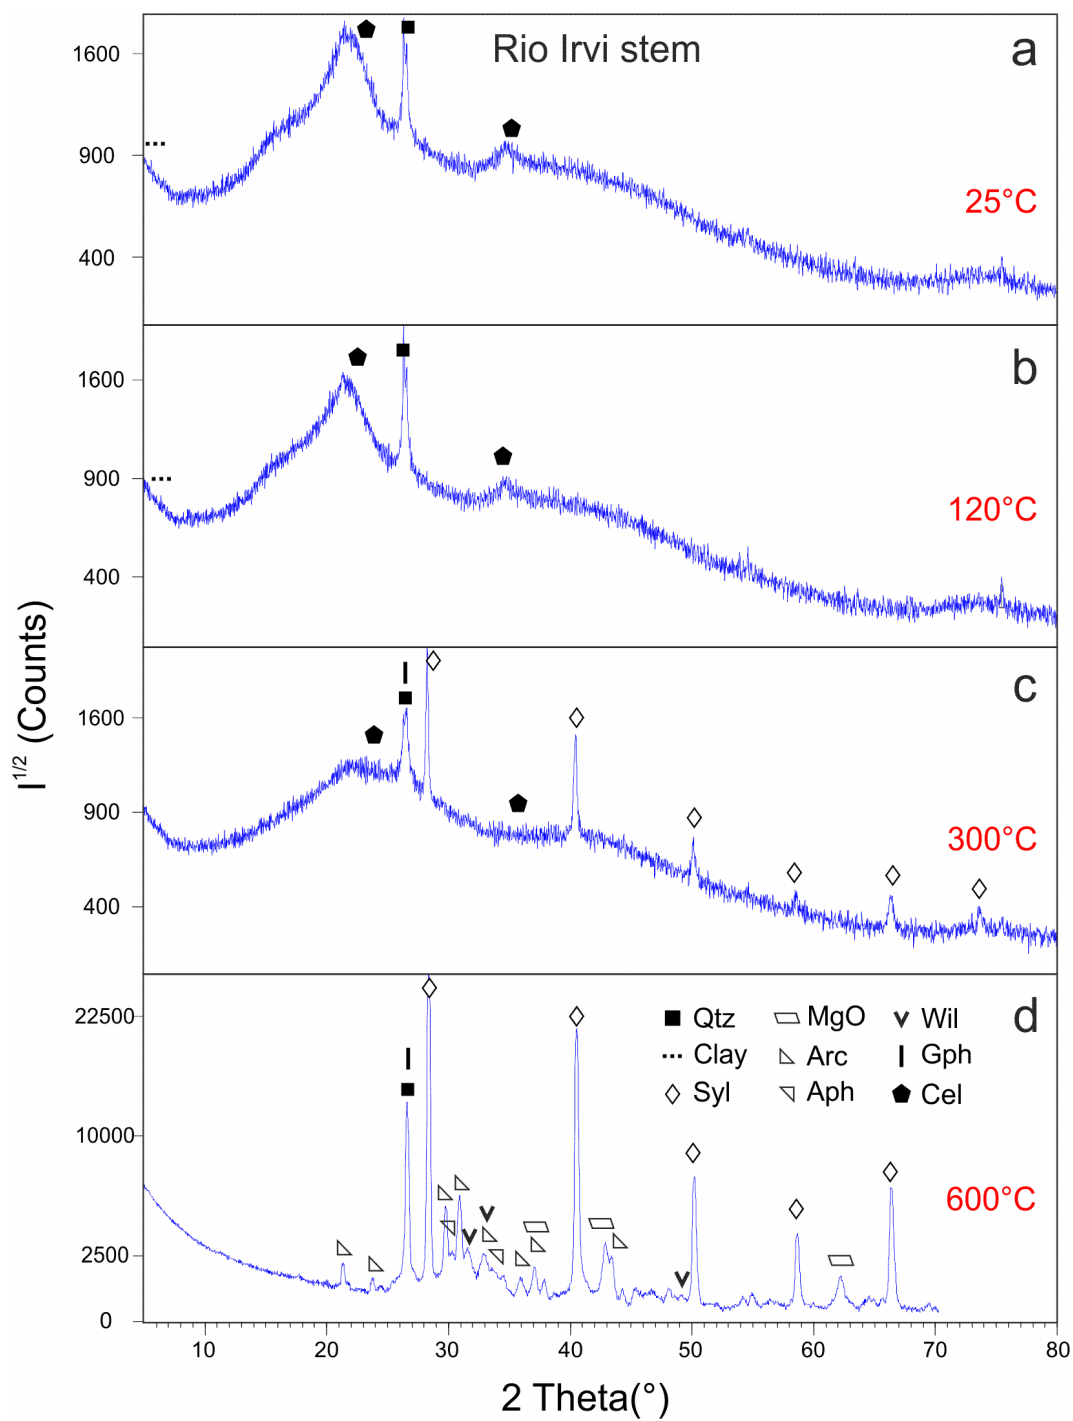

**Figure S3.** Comparison of XRD patterns collected on stems from Rio Irvi before (a) and after *ex-situ* heating (b-d). Intensities ( $I^{1/2}$ ) are reported in square root scale. Abbreviation are: Qtz, quartz; Clay, clayey minerals; Syl, sylvite; MgO, magnesium oxide; Arc, arcanite; Aph, aphthitalite; Wil, willemite; Gph, graphite; Cell, cellulose.

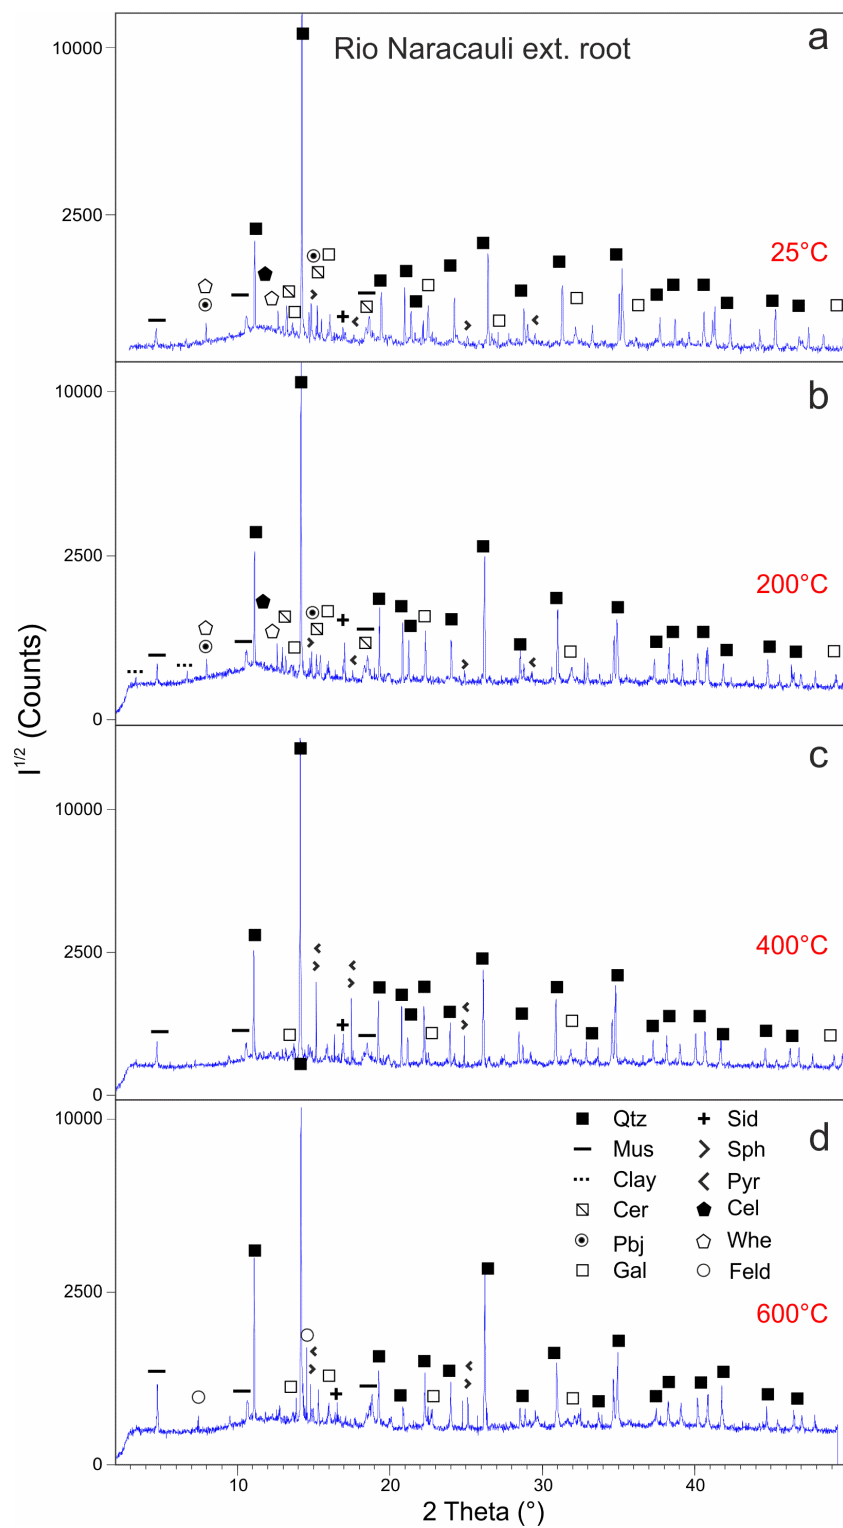

**Figure S4.** Comparison of XRD patterns collected on external roots from Rio Naracauli before (a) and after *in-situ* heating (b-d). Intensities ( $I^{1/2}$ ) are reported in square root scale. Abbreviation are: Qtz, quartz; Mus, muscovite; Clay, clayey minerals; Cer, cerussite; Pbj, plumbojarosite; Gal, galena, Sid, siderite; Sph, sphalerite; Pyr, pyrite; Cel, cellulose; Whe, whevellite; Feld, feldspars.

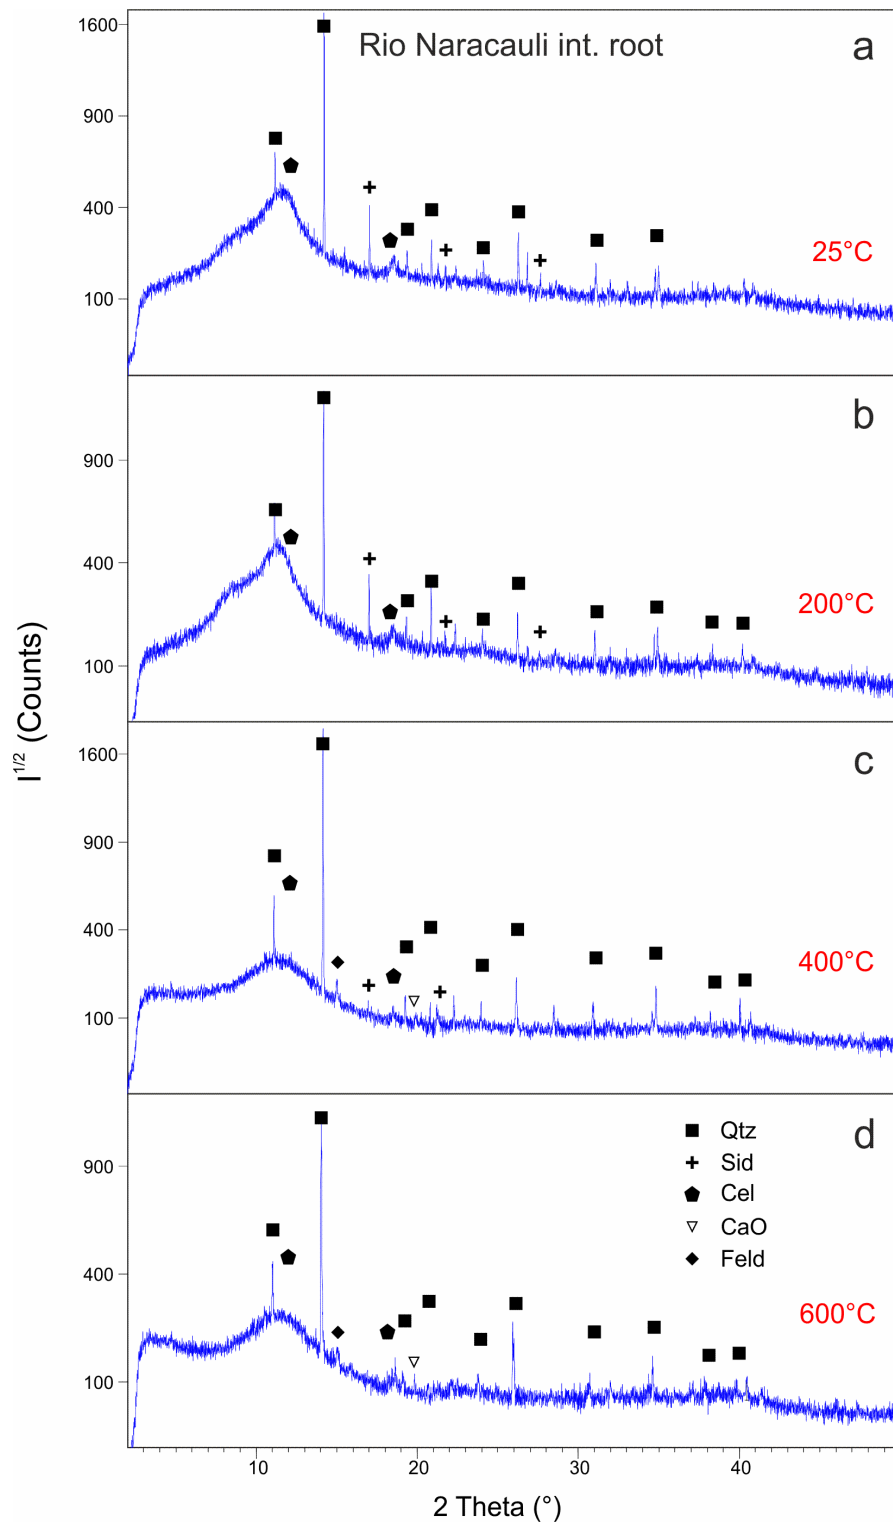

**Figure S5.** Comparison of XRD patterns collected on internal roots from Rio Naracauli before (a) and after *in-situ* heating (b-d). Intensities ( $I^{1/2}$ ) are reported in square root scale. Abbreviation are: Qtz, quartz; Sid, siderite; Cel, cellulose; CaO, calcium oxide; Feld, feldspars.

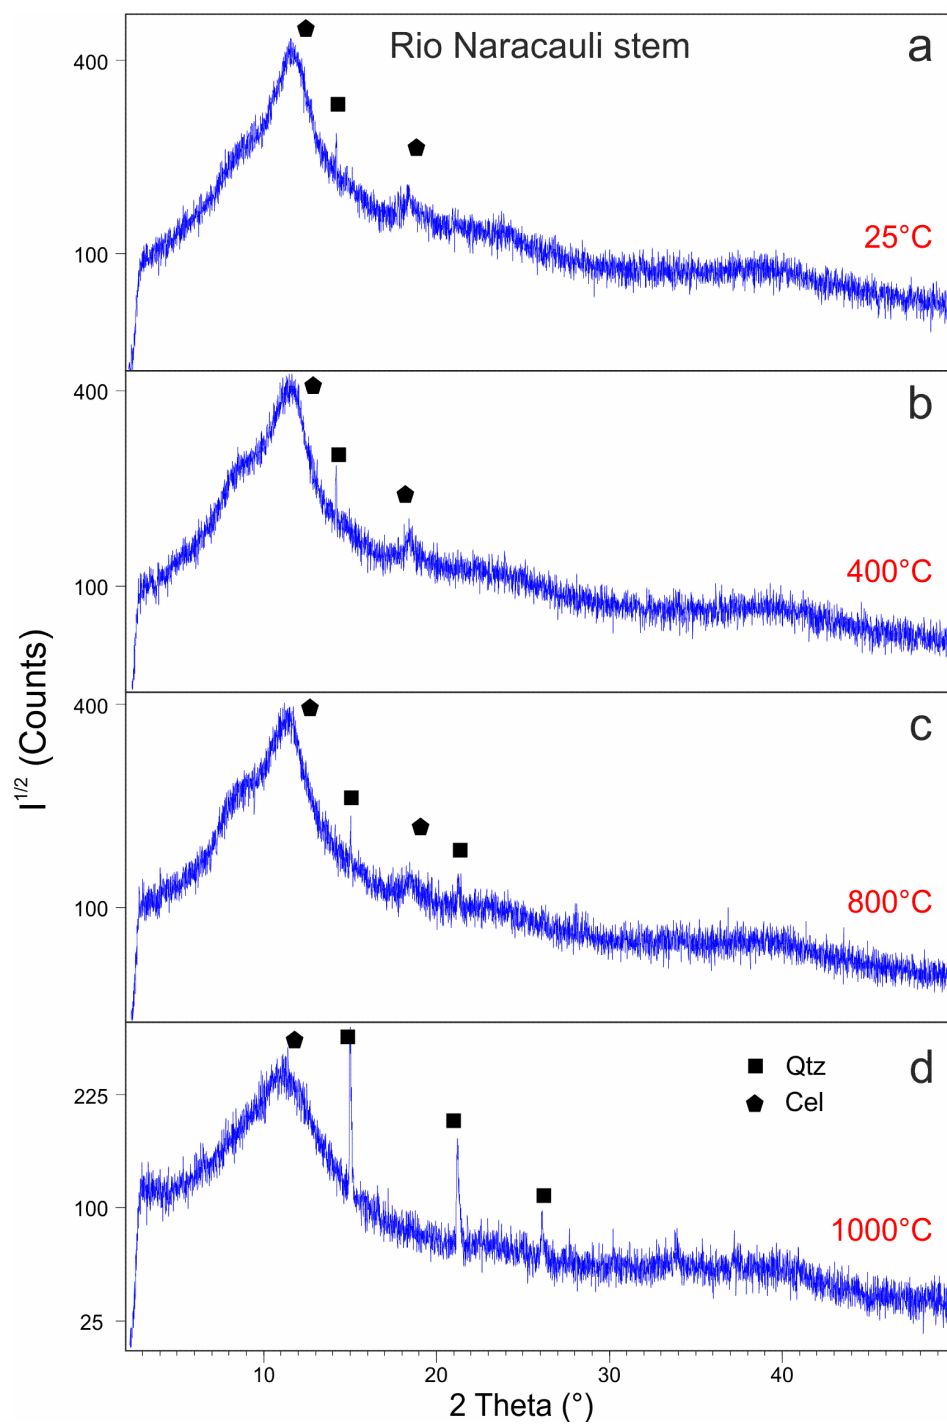

**Figure S6.** Comparison of XRD patterns collected on stems from Rio Naracauli before (a) and after *in-situ* heating (b-d). Intensities ( $I^{1/2}$ ) are reported in square root scale. Abbreviation are: Qtz, quartz; Cel, cellulose.
